# Supplementary material for: Compositional and functional features of the intestinal lactobacilli associated with different long-term diet types
Source: Royal Society of Chemistry journal article supplement (doi:10.1039/d3fo02182c), 2023-01-01
Supplement: d3fo02182c1.pdf [file d3fo02182c1.pdf]

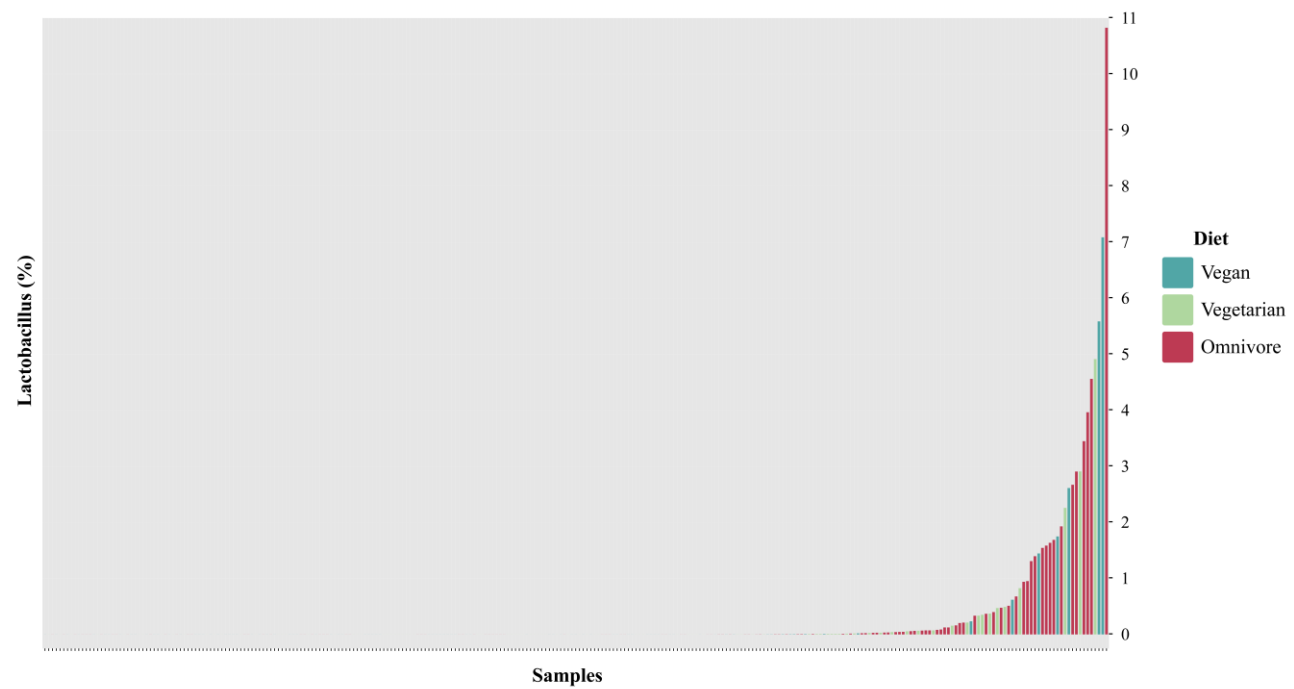

Supplementary Figure S1. Abundance of lactobacilli found in the gut metagenomes. Related to Figure 1A. Samples are colored according to the diet type.

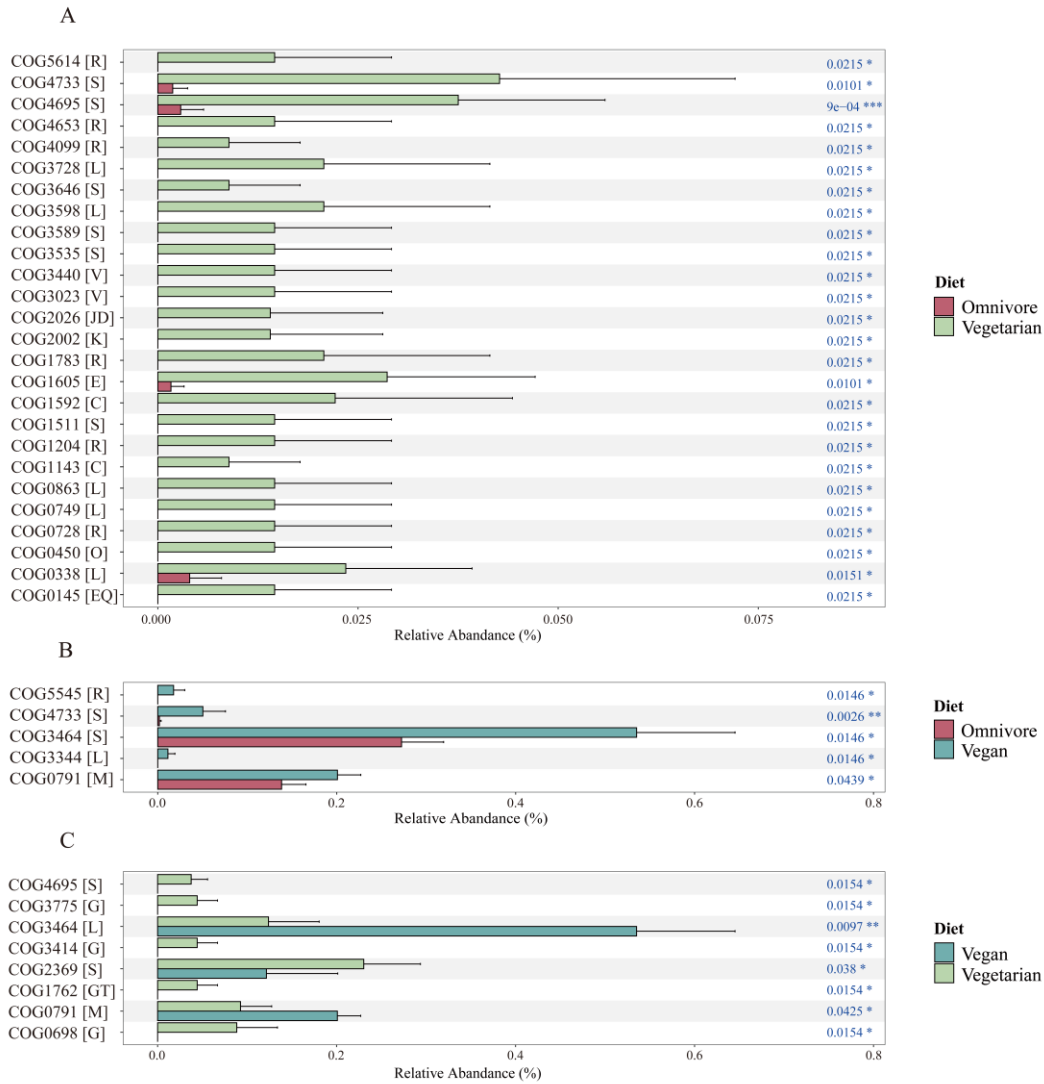

Supplementary Figure S2. Histogram from Wilcoxon test representing differentially abundant of COG-based function. (A) differentially abundant COGs between vegetarians and omnivores; (C) differentially abundant COGs between vegans and omnivores; (D) differentially abundant COGs between vegans and vegetarians. (\* $p < 0.05$  were considered significant, \*\* $p < 0.01$ , \*\*\* $p < 0.005$ )
