# Supplementary material for: Compositional and functional features of the intestinal lactobacilli associated with different long-term diet types
Source: Royal Society of Chemistry journal article supplement (doi:10.1039/d3fo02182c), 2023-01-01
Supplement: d3fo02182c3.xlsx [file d3fo02182c3.xlsx]

## Sheet: Sheet1
Supplementary Table S2. Ligilactobacillus ruminis EggNOG_OGs with a Significantly Different Occurrence in Vegans, Vegetarians, and Omnivores
Comparison of Vegans (V), Vegetarians (VG) versus Omnivores (O)
EggNOG_OGs	COG_category	Description	p-value (<0.05)	Prevalence in V (%)	Prevalence in VG (%)	Prevalence in O (%)
COG4695	[S]	Phage portal protein	0.000306689	0	0.428571	0.025641
COG4733	[S]	Psort location Cytoplasmic, score	0.00920507	0.307692	0.285714	0.025641
COG0338	[L]	D12 class N6 adenine-specific DNA methyltransferase	0.0108098	0	0.285714	0.025641
COG0145	[EQ]	Hydantoinase/oxoprolinase N-terminal region	0.0243728	0	0.142857	0
COG0450	[O]	Peroxiredoxin	0.0243728	0	0.142857	0
COG0728	[R]	Involved in peptidoglycan biosynthesis. Transports lipid-linked peptidoglycan precursors from the inner to the outer leaflet of the cytoplasmic membrane	0.0243728	0	0.142857	0
COG0749	[L]	DNA polymerase	0.0243728	0	0.142857	0
COG0863	[L]	DNA methylase	0.0243728	0	0.142857	0
COG1143	[C]	binding domain protein	0.0243728	0	0.142857	0
COG1204	[R]	DEAD-like helicases superfamily	0.0243728	0	0.142857	0
COG1511	[S]	type VII secretion protein EsaA	0.0243728	0	0.142857	0
COG1592	[C]	IrrE N-terminal-like domain	0.0243728	0	0.142857	0
COG1783	[R]	Phage terminase, large subunit	0.0243728	0	0.142857	0
COG2002	[K]	Antidote-toxin recognition MazE, bacterial antitoxin	0.0243728	0	0.142857	0
COG2026	[JD]	ParE toxin of type II toxin-antitoxin system, parDE	0.0243728	0	0.142857	0
COG3023	[V]	Glycosyl hydrolases family 25	0.0243728	0	0.142857	0
COG3440	[V]	HNH endonuclease	0.0243728	0	0.142857	0
COG3535	[S]	Protein of unknown function (DUF917)	0.0243728	0	0.142857	0
COG3589	[S]	Bacterial protein of unknown function (DUF871)	0.0243728	0	0.142857	0
COG3598	[L]	Primase C terminal 2 (PriCT-2)	0.0243728	0	0.142857	0
COG3646	[S]	Transcriptional regulator	0.0243728	0	0.142857	0
COG3728	[L]	terminase, small subunit	0.0243728	0	0.142857	0
COG4653	[R]	Phage capsid family	0.0243728	0	0.142857	0
COG5614	[R]	Phage head-tail joining protein	0.0243728	0	0.142857	0
COG3344	[L]	reverse transcriptase	0.027309	0.153846	0	0
COG5545	[R]	Virulence-associated protein E	0.027309	0.153846	0	0
COG1605	[E]	Chorismate mutase type II	0.0435984	0.0769231	0.285714	0.025641
COG0791	[M]	NlpC P60 family protein	0.0458006	0.923077	0.571429	0.538462
COG1388	[M]	Mannosyl-glycoprotein endo-beta-N-acetylglucosaminidase	0.0480718	0.615385	1	0.871795
Comparison of Vegetarians (VG) versus Omnivores (O)
EggNOG_OGs	COG_category	Description	p-value (<0.05)	Prevalence in VG (%)	Prevalence in O (%)
COG0145	[EQ]	Hydantoinase/oxoprolinase N-terminal region	0.0215	0.142857	0
COG0338	[L]	D12 class N6 adenine-specific DNA methyltransferase	0.0151	0.285714	0.025641
COG0450	[O]	Peroxiredoxin	0.0215	0.142857	0
COG0728	[R]	Involved in peptidoglycan biosynthesis. Transports lipid-linked peptidoglycan precursors from the inner to the outer leaflet of the cytoplasmic membrane	0.0215	0.142857	0
COG0749	[L]	DNA polymerase	0.0215	0.142857	0
COG0863	[L]	DNA methylase	0.0215	0.142857	0
COG1143	[C]	binding domain protein	0.0215	0.142857	0
COG1204	[R]	DEAD-like helicases superfamily	0.0215	0.142857	0
COG1511	[S]	type VII secretion protein EsaA	0.0215	0.142857	0
COG1592	[C]	IrrE N-terminal-like domain	0.0215	0.142857	0
COG1605	[E]	Chorismate mutase type II	0.0101	0.285714	0.025641
COG1783	[R]	Phage terminase, large subunit	0.0215	0.142857	0
COG2002	[K]	Antidote-toxin recognition MazE, bacterial antitoxin	0.0215	0.142857	0
COG2026	[JD]	ParE toxin of type II toxin-antitoxin system, parDE	0.0215	0.142857	0
COG3023	[V]	Glycosyl hydrolases family 25	0.0215	0.142857	0
COG3440	[V]	HNH endonuclease	0.0215	0.142857	0
COG3535	[S]	Protein of unknown function (DUF917)	0.0215	0.142857	0
COG3589	[S]	Bacterial protein of unknown function (DUF871)	0.0215	0.142857	0
COG3598	[L]	Primase C terminal 2 (PriCT-2)	0.0215	0.142857	0
COG3646	[S]	Transcriptional regulator	0.0215	0.142857	0
COG3728	[L]	terminase, small subunit	0.0215	0.142857	0
COG4099	[R]	Prolyl oligopeptidase family	0.0215	0.142857	0
COG4653	[R]	Phage capsid family	0.0215	0.142857	0
COG4695	[S]	Phage portal protein	9e−04	0.428571	0.025641
COG4733	[S]	Psort location Cytoplasmic, score	0.0101	0.285714	0.025641
COG5614	[R]	Phage head-tail joining protein	0.0215	0.142857	0
Comparison of Vegans (V) versus Omnivores (O)
EggNOG_OGs	COG_category	Description	p-value (<0.05)	Prevalence in V (%)	Prevalence in O (%)
COG0791	[M]	NlpC P60 family protein	0.0439	0.923077	0.538462
COG3344	[L]	reverse transcriptase	0.0146	0.153846	0
COG3464	[S]	PFAM transposase, IS204 IS1001 IS1096 IS1165 family protein	0.0146	0.923077	0.74359
COG4733	[S]	Psort location Cytoplasmic, score	0.0026	0.307692	0.025641
COG5545	[R]	Virulence-associated protein E	0.0146	0.153846	0
Comparison of Vegans (V) versus Vegetarians (VG)
EggNOG_OGs	COG_category	Description	p-value (<0.05)	Prevalence in V (%)	Prevalence in VG (%)
COG0698	[G]	Ribose/Galactose Isomerase	0.0154	0	0.428571
COG0791	[M]	NlpC P60 family protein	0.0425	0.923077	0.571429
COG1762	[GT]	Phosphoenolpyruvate-dependent sugar phosphotransferase system, EIIA 2	0.0154	0	0.428571
COG2369	[S]	cell adhesion	0.038	0.307692	0.857143
COG3414	[G]	PTS system, Lactose/Cellobiose specific IIB subunit	0.0154	0	0.428571
COG3464	[L]	PFAM transposase, IS204 IS1001 IS1096 IS1165 family protein	0.0097	0.923077	0.571429
COG3775	[G]	PTS system sugar-specific permease component	0.0154	0	0.428571
COG4695	[S]	Phage portal protein	0.0154	0	0.428571
